# Supplementary material for: Sunlight-induced crosslinking of 1,2-polybutadienes: access to fluorescent polymer networks
Source: Royal Society of Chemistry journal article supplement (doi:10.1039/c3py01381b), 2013-11-01
Supplement: c3py01381b.pdf [file c3py01381b.pdf]

Supporting Information for

# Sunlight-induced Crosslinking of 1,2- Polybutadienes: Access to Fluorescent Polymer Networks

*Jan O. Mueller,<sup>a,b</sup> Nathalie K. Guimard,<sup>a,b,c</sup> Kim K. Oehlenschlaeger,<sup>a,b</sup> Friedrich G. Schmidt,<sup>d</sup>  
Christopher Barner-Kowollik\*<sup>a,b</sup>*

<sup>a</sup> Preparative Macromolecular Chemistry, Institut für Technische Chemie und Polymerchemie, Karlsruhe Institute of Technology (KIT), Engesserstr. 18, 76128 Karlsruhe, Germany.

<sup>b</sup> Institut für Biologische Grenzflächen, Karlsruhe Institute of Technology (KIT), Hermann-von-Helmholz-Platz 1, 76344 Eggenstein-Leopoldshafen, Germany.

<sup>c</sup> INM - Leibniz-Institut für Neue Materialien gGmbH, Campus D2 2, 66123 Saarbrücken, Germany.

<sup>d</sup> Evonik Industries AG, Paul-Baumann-Strasse 1, 45764 Marl, Germany.

**Materials.** Formyl-benzoic acid (96 %, Acros Organics), *p*-toluenesulfonyl hydrazide (98 %, Alfa Aesar), pyridine (99 %, ABCR), anisidine (99 %, ABCR), HCl (37 %, Roth), sodium nitrite ( $\text{NaNO}_2$ , 98 %, Alfa Aesar) thionyl chloride ( $\text{SOCl}_2$ , 99.5 %, Acros Organics), polybutadiene predominantly 1,2-addition (**PBD-1**, approx. 90% 1,2-vinyl, Sigma-Aldrich), and tetrahydrofuran (THF, 99.5 % extra dry, Acros Organics) were used as received. 1,2-polybutadiene (JSR RB\_820, **PBD-2**) was kindly provided by NRC (Nordmann, Rassmann).

**Characterization.** *Size exclusion chromatography (SEC).* To determine molecular weight distributions (MWD) a SEC system (Polymer Laboratories PL-GPC 50 Plus) comprised of an auto injector, a guard column (PLgel Mixed C,  $50 \times 7.5$  mm) followed by three linear columns (PLgel Mixed C,  $300 \times 7.5$  mm, 5  $\mu\text{m}$  bead-size) and a differential refractive index detector was employed. THF was used as the eluent at 35 °C, with a flow rate of 1  $\text{mL} \cdot \text{min}^{-1}$ . The SEC system was calibrated using narrow poly(methyl methacrylate) standards ranging from 600 to  $6 \times 10^5 \text{ g mol}^{-1}$  (Polymer Standards Service (PSS), Mainz, Germany). The resulting molecular weight distributions were determined by universal calibration using Mark-Houwink parameters for polystyrene ( $K = 14.1 \times 10^{-5} \text{ dL g}^{-1}$ ,  $\alpha = 0.7$ ).

*NMR spectroscopy.* Bruker AM 250 (250 MHz) and Bruker AM 400 (400 MHz) spectrometers were used for the  $^1\text{H}$ -NMR and  $^{13}\text{C}$ -NMR spectroscopy, respectively. Samples were characterized using  $\text{CDCl}_3$  as the solvent. The  $\delta$ -scale is referenced to the internal standard trimethylsilane (TMS,  $\delta = 0.00$  ppm).

*Electrospray ionization - mass spectrometry (ESI-MS).* ESI-MS spectra were recorded on a LXQ mass spectrometer (ThermoFisher Scientific, San Jose, CA, USA) equipped with an atmospheric pressure ionization source operating in the nebulizer assisted electrospray mode.

The instrument was calibrated in the  $m/z$  range of 195-1822 using a standard containing caffeine, Met-Arg-Phe-Ala acetate (MRFA) and a mixture of fluorinated phosphazenes (Ultramark 1621) (all from Aldrich). A constant spray voltage of 4.5 kV was used. Nitrogen was applied at a dimensionless sweep gas flow-rate of 2 (approx. 3 L min<sup>-1</sup>) and a dimensionless sheath gas flow-rate of 12 (approx. 1 L min<sup>-1</sup>) were applied. The capillary voltage, the tube lens offset voltage and the capillary temperature were set to 60 V, 110 V, and 275 °C respectively.

*Fluorescence and UV-Vis spectroscopy.* Fluorescence emission spectra were recorded for samples in quartz cuvettes loaded with a sample volume of 230 µL on a Varian Cary Eclipse Fluorescence Spectrometer. UV-Visible spectroscopy was performed using a Varian Cary 300 Bio spectrophotometer featuring a thermostatted sample cell holder. Absorption spectra were measured for  $1.0 \times 10^{-4}$  mol L<sup>-1</sup> samples in acetonitrile solution from 200 to 800 nm with a resolution of 1 nm and slit width of 2 nm in a 1 cm UV cuvette.

**Spectroscopic data of di-linker.**

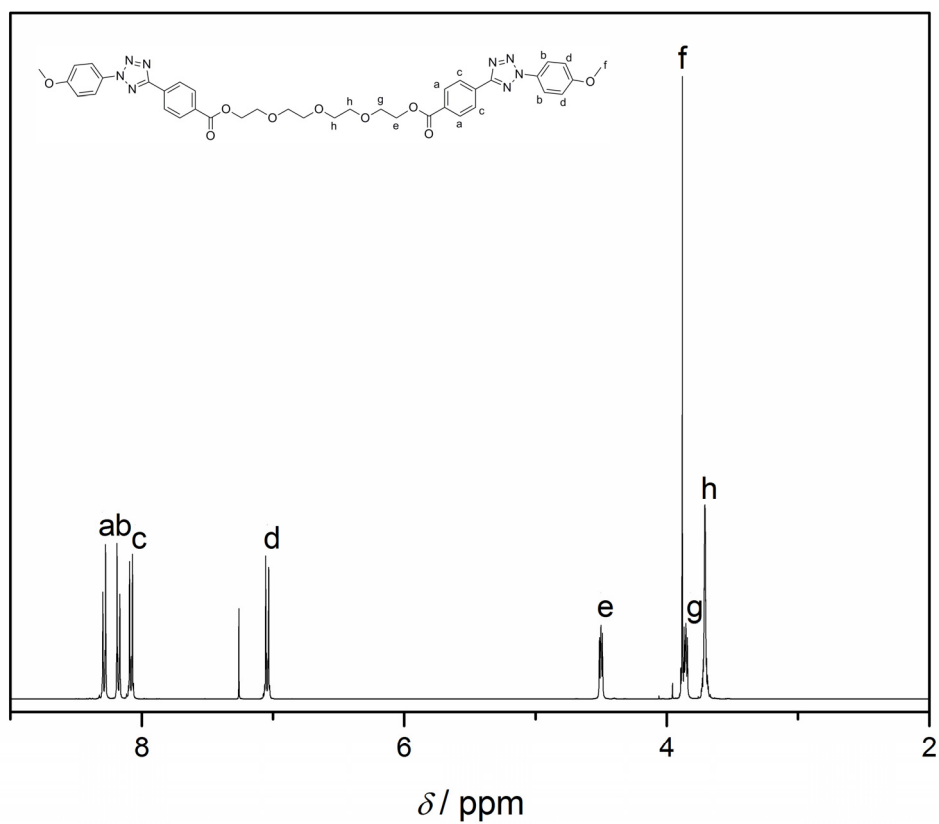

**Figure S1.**  $^1\text{H}$ -NMR spectrum of **di-linker** in  $\text{CDCl}_3$ .

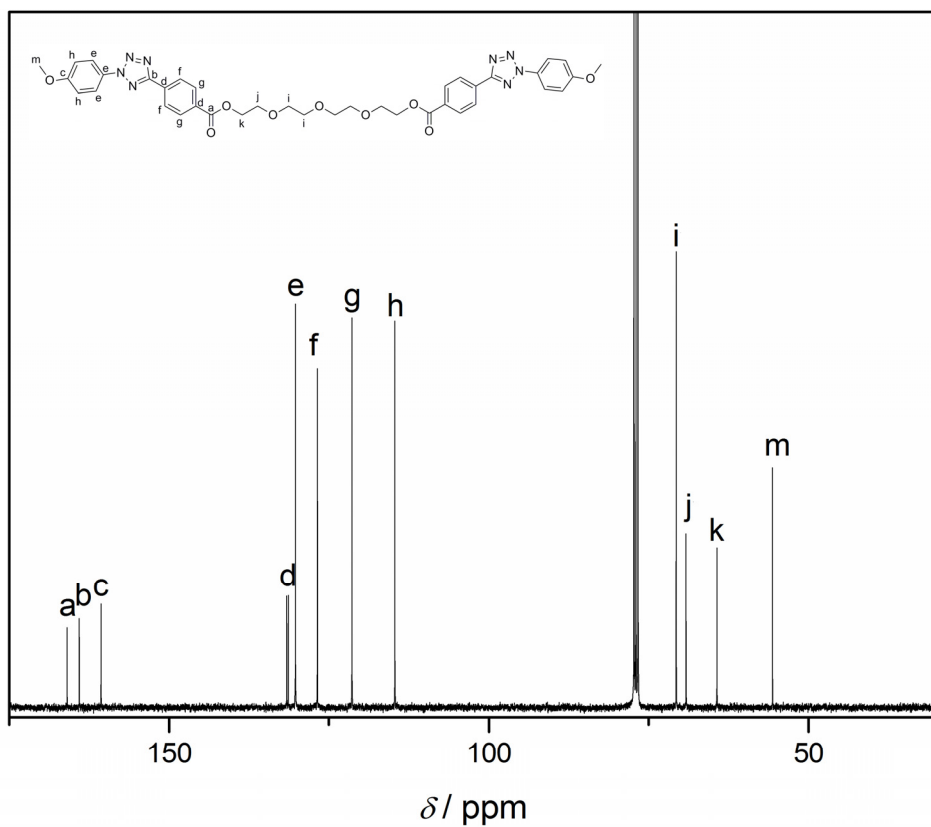

**Figure S2.**  $^{13}\text{C}$ -NMR spectrum of **di-linker** in  $\text{CDCl}_3$ .

### UV-lamp specifications.

- *Arimed B6*, Cosmedico GmbH, Stuttgart, Germany. Compact low-pressure fluorescent lamp, 36 W,  $\lambda_{\text{max}} = 320 \text{ nm}$  ( $\pm 30 \text{ nm}$ ).
- *Philips Cleo PL-L*, Philips Deutschland GmbH. Compact low-pressure fluorescent lamp, 36 W,  $\lambda_{\text{max}} = 355 \text{ nm}$  ( $\pm 50 \text{ nm}$ ).
- *Philips TL01*, Philips Deutschland GmbH. Philips Medical Therapy UV-B Narrow Band/01, 36W  $\lambda_{\text{max}} = 312 \text{ nm}$  ( $\pm 5 \text{ nm}$ ).

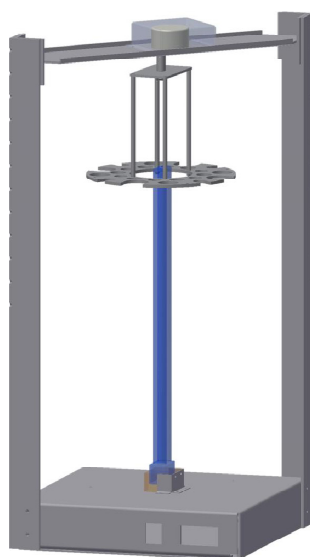

**Figure S3.** Illustration of the custom-built photoreactor employed in the current study.

### Additional mass spectra concerning the small molecule model study.

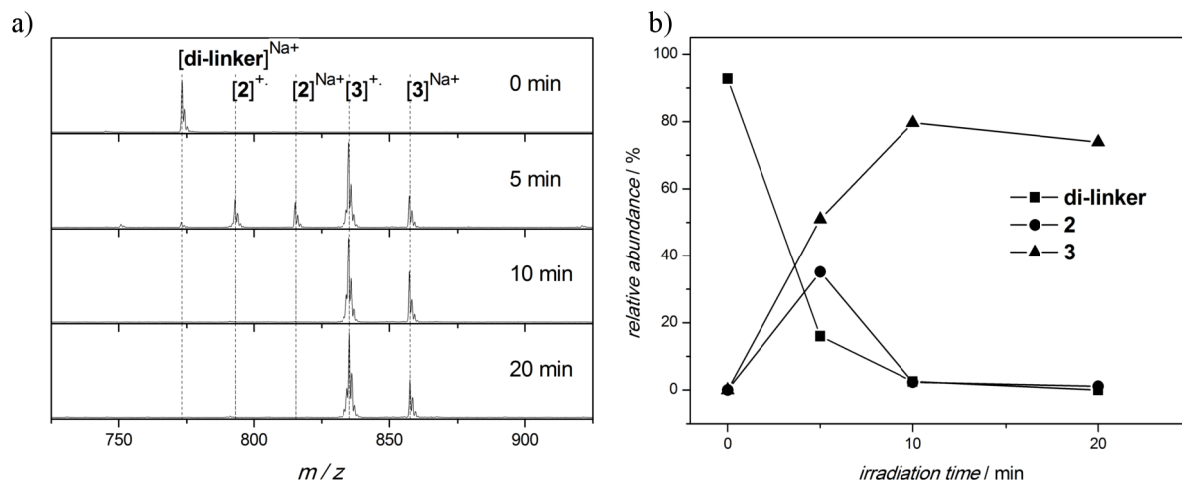

**Figure S4.** Kinetic investigation of the small molecule model reaction between 1-pentene and the **di-linker** employing the *Philips TL01* UV-lamp. a) ESI-MS spectra after 0, 5, 10, and 20 min of reaction time. b) graph of the relative abundance of di-linker, mono-functionalized intermediate (**2**) and di-functionalized product (**3**) as a function of irradiation time determined from integration of the corresponding ESI-MS spectra.

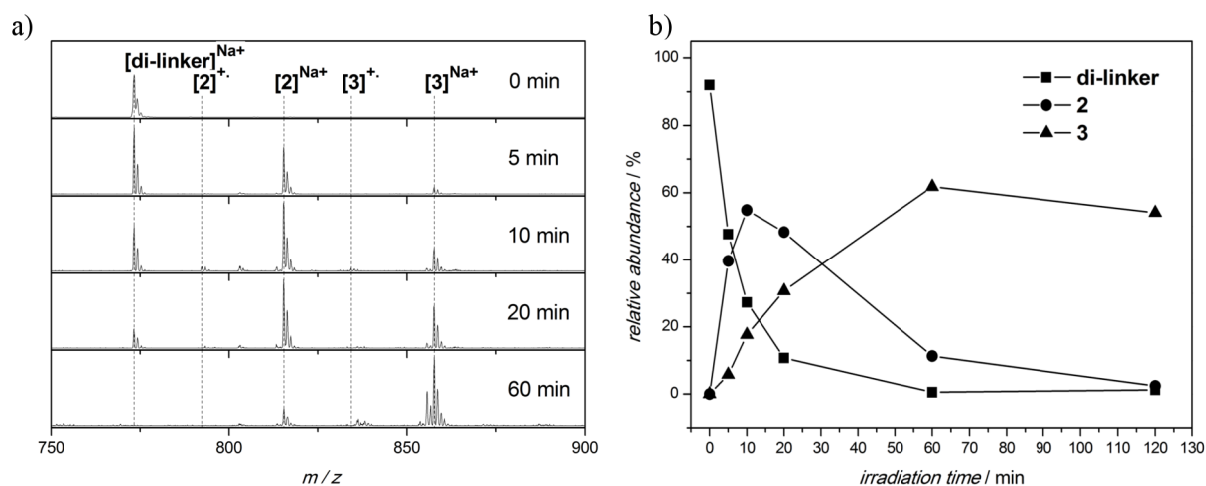

**Figure S5.** Kinetic investigation of the small molecule model reaction between 1-pentene and the **di-linker** employing the *Philips Cleo PL-L* UV-lamp. a) ESI-MS spectra after 0, 5, 10, 20, and 60 min of reaction time. b) graph of the relative abundance of di-linker, mono-functionalized intermediate (**2**) and di-functionalized product (**3**) as a function of irradiation time determined via integration of the corresponding ESI-MS spectra.



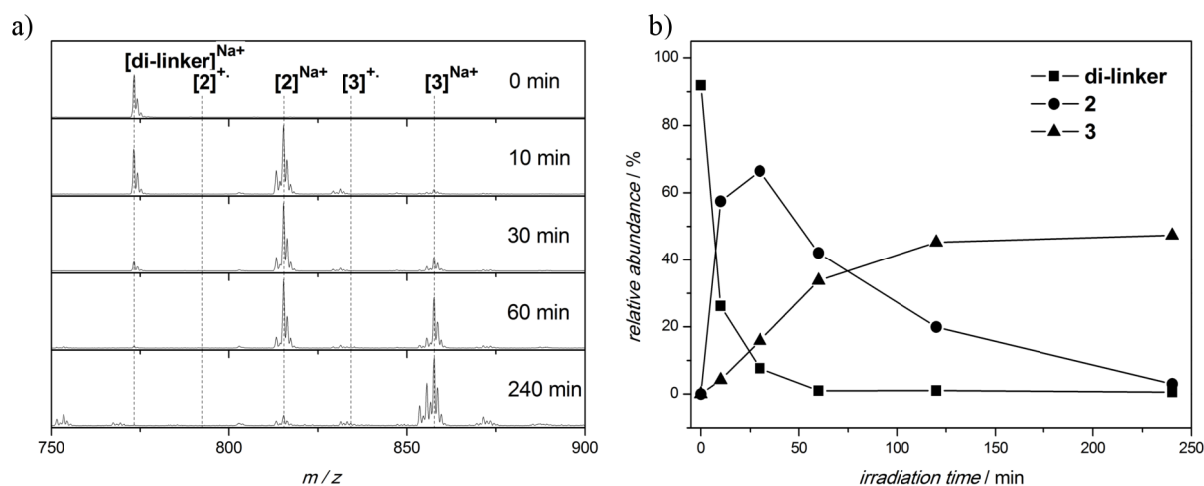

**Figure S6.** Kinetic investigation of the small molecule model reaction between 1-pentene and the **di-linker** in sunlight. a) ESI-MS spectra after 0, 10, 30, 120 and 240 min of reaction time. b) graph of the relative abundance of di-linker, mono-functionalized intermediate (**2**) and di-functionalized product (**3**) as a function of irradiation time determined from integration of the corresponding ESI-MS spectra.

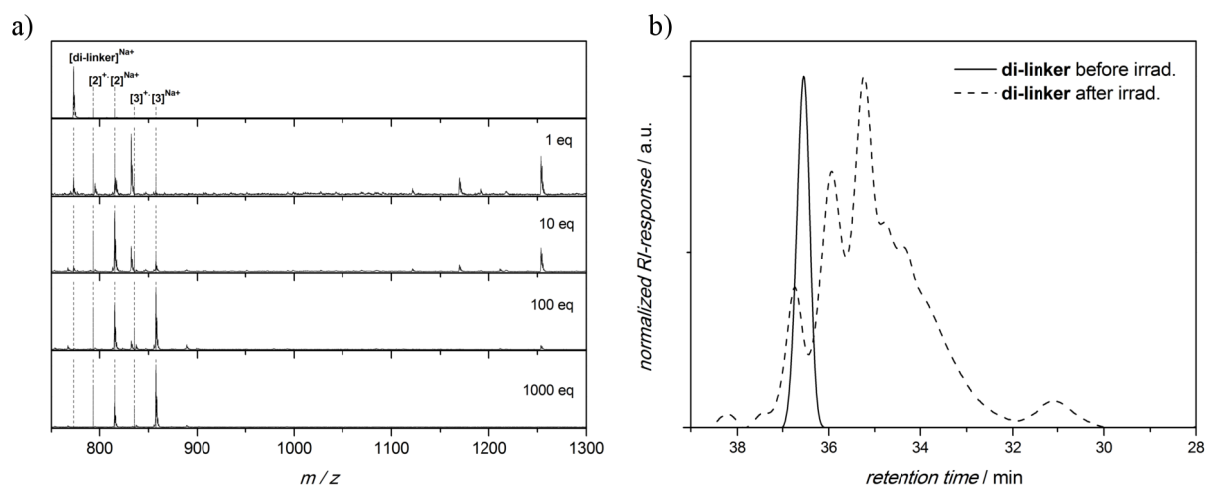

**Figure S7.** a) ESI-MS spectra of the reaction mixtures of the **di-linker** and 1-pentene with varying equivalents of the dipolarophile (1-pentene). b) SEC elugram of the dimerization reaction of the **di-linker** in THF. The reactions were performed at a **di-linker** concentration of  $0.1 \text{ mg mL}^{-1}$  under irradiation with the *Arimed B6* UV-lamp for 1 h.

**Spectroscopic data of product 3.**

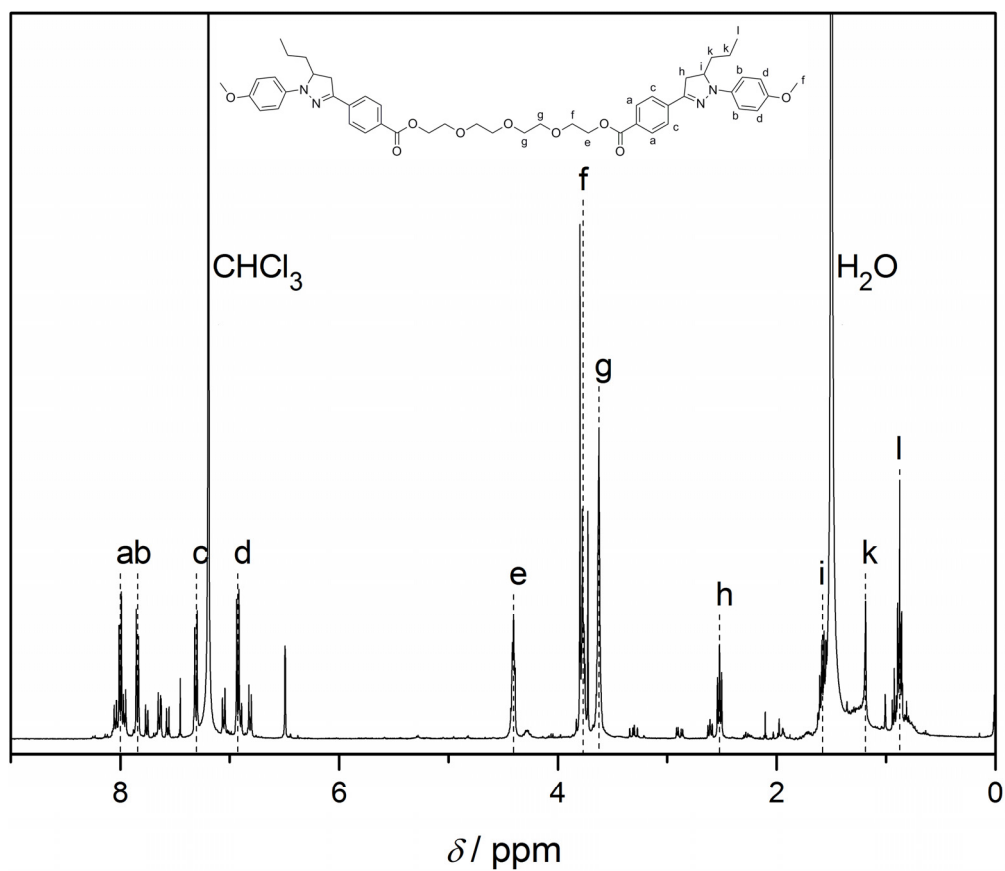

**Figure S8:**  $^1\text{H}$ -NMR spectrum of **3** in  $\text{CDCl}_3$ . The signals referring to the main isomer are labeled in the depicted structure.
